# Supplementary material for: Synthesis of far-red- and near-infrared-emitting Cu-doped InP/ZnS (core/shell) quantum dots with controlled doping steps and their surface functionalization for bioconjugation
Source: Royal Society of Chemistry journal article supplement (doi:10.1039/c9nr02192b), 2019-01-01
Supplement: c9nr02192b1.pdf [file c9nr02192b1.pdf]

## Supplementary Information

# Synthesis of Far-Red- and Near-Infrared-emitting Cu-doped InP/ZnS (Core/Shell) Quantum Dots with Controlled Doping Step and their Surface Functionalization for Bioconjugation

*Mihye Lim<sup>a,†</sup>, Wonseok Lee<sup>a,†</sup>, Gyuhyun Bang<sup>a</sup>, Woo Jin Lee<sup>a</sup>, Youngrong Park<sup>a</sup>, Yongju Kwon<sup>a</sup>, Yebin Jung<sup>a</sup>, Sungjee Kim<sup>a,\*</sup> and Jiwon Bang<sup>b,\*</sup>*

<sup>a</sup>Department of Chemistry, Pohang University of Science and Technology (POSTECH), 77 Cheongam-ro, Namgu, Pohang 37673, Republic of Korea.

<sup>b</sup> Electronic Conversion Materials Division, Korea Institute of Ceramic Engineering and Technology, Jinju 52852, Republic of Korea.

† Mihye Lim and Wonseok Lee contributed equally to this work.

\* Corresponding author.

Email address : [sungjee@postech.ac.kr](mailto:sungjee@postech.ac.kr), [jwbang@kicet.re.kr](mailto:jwbang@kicet.re.kr)

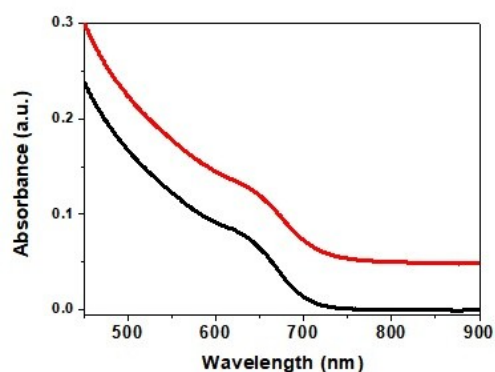

**Figure S1.** Absorption spectra of undoped InP/ZnS QDs (black) and Cu:InP/ZnS d-dots (red) quantum dots (QD) for samples shown in Figure 1.

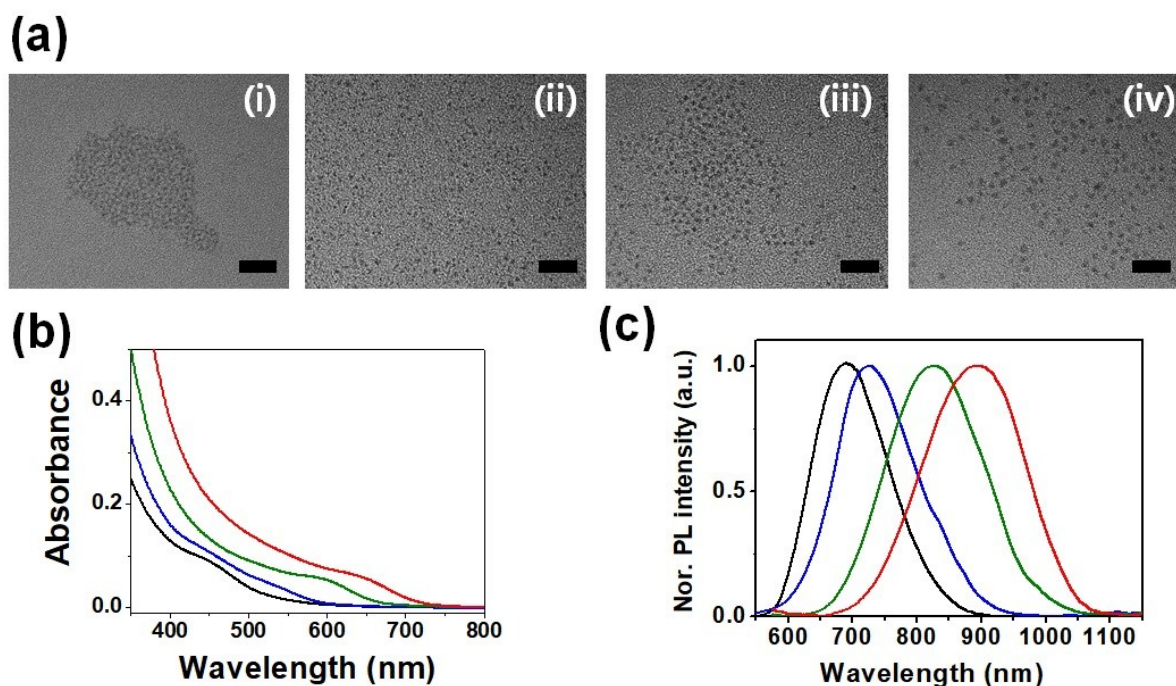

**Figure S2.** (a) Transmission electron microscope (TEM) images of differently sized Cu doped InP quantum dots (QD) samples (scale bar: 20 nm), where: (i) black-sample, (ii) blue-sample, (iii) green-sample, and (iv) red-sample. Average particle sizes are 1.83 nm (i), 2.16 nm (ii), 2.92 nm (iii), 3.39 nm (iv), respectively. (b) Absorption and (c) photoluminescence (PL) spectra of the corresponding Cu doped InP QD samples.

\* InP QD samples of sizes 2.92 nm and 3.39 nm were prepared by repeated alternating injections of additional indium and phosphorus precursors in the InP QD growth solution<sup>R1</sup> at 210 °C until the desired size was achieved.

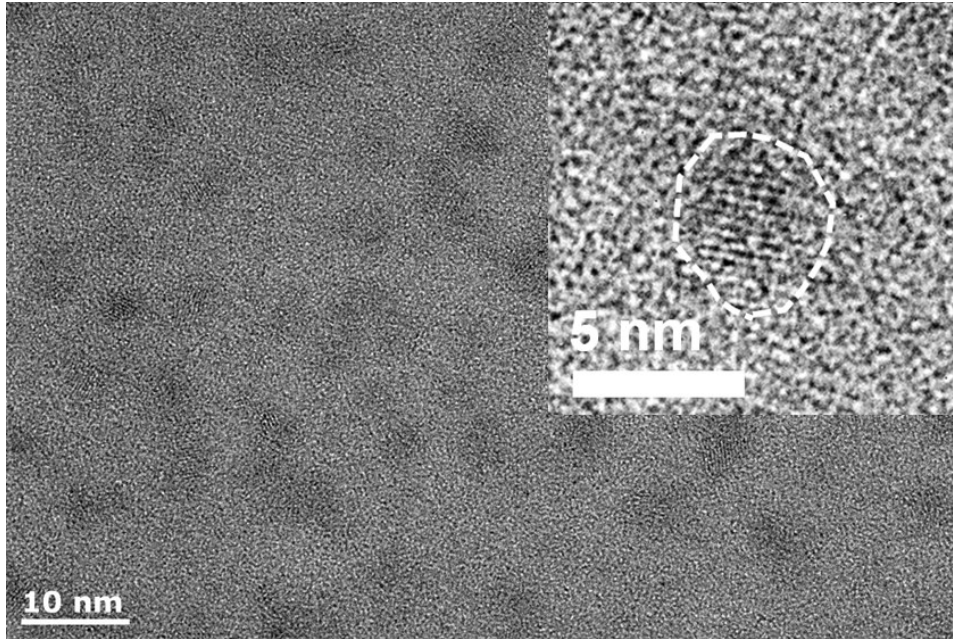

**Figure S3.** HR-TEM image of InP/ZnS:Cu/ZnS (3MLs) QDs. The partially magnified image is shown in the inset panel)

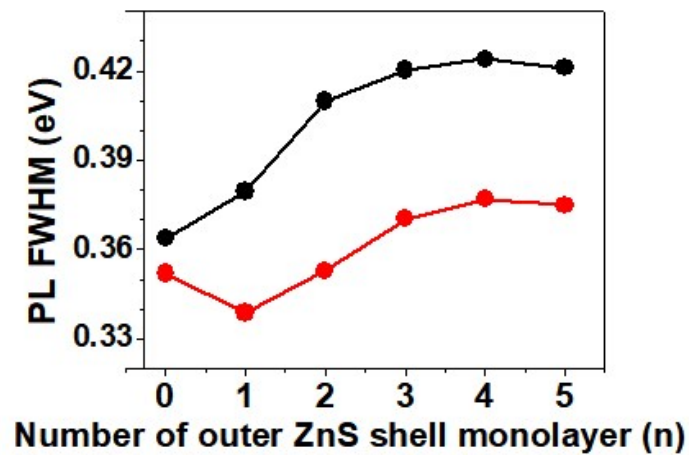

**Figure S4.** Photoluminescence full-width at half-maximum (FWHM) values as functions of outer shell thickness for the InP:Cu/ZnS QD (black) and InP/ZnS:Cu/ZnS QD (red) samples shown in Figure 2.

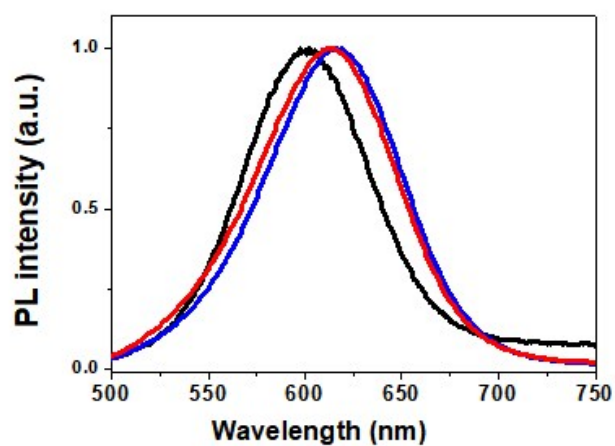

**Figure S5.** Photoluminescence spectra of bare InP quantum dots (QDs; black), InP/ZnS (core/shell) QDs with 2 ML of ZnS shell (red), and 4 ML of ZnS shell (blue).

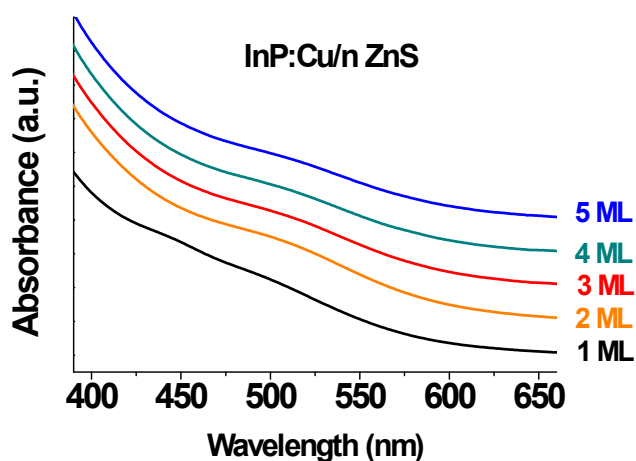

**Figure S6.** Absorption spectra of the InP:Cu/ZnS QDs with varying the ZnS shell thickness that represented in Figure 2.

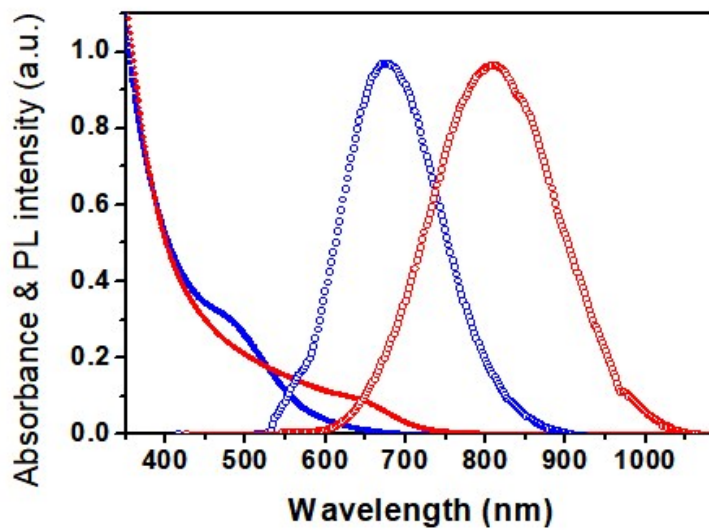

**Figure S7.** Absorbance (filled circle) and photoluminescence (open circle) spectra of the far-red (blue) and NIR (red) emitting InP/ZnS:Cu/ZnS QD samples dispersed in hexanes.

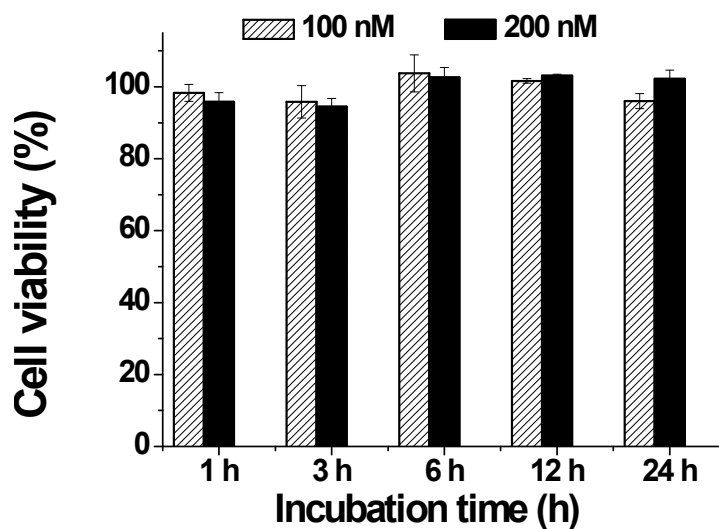

**Figure S8.** Cytotoxicity assays of InP/ZnS:Cu/ZnS quantum dots (QDs) in MDA-MB-231 cells by cell counting kit-8 assay. Cells were incubated with 100 nM or 200 nM QD probes for 1-24 h at 37°C. Measurement results are expressed as the ratio between the absorbance of the sample and that of negative control cells that had not experienced sample incubation.

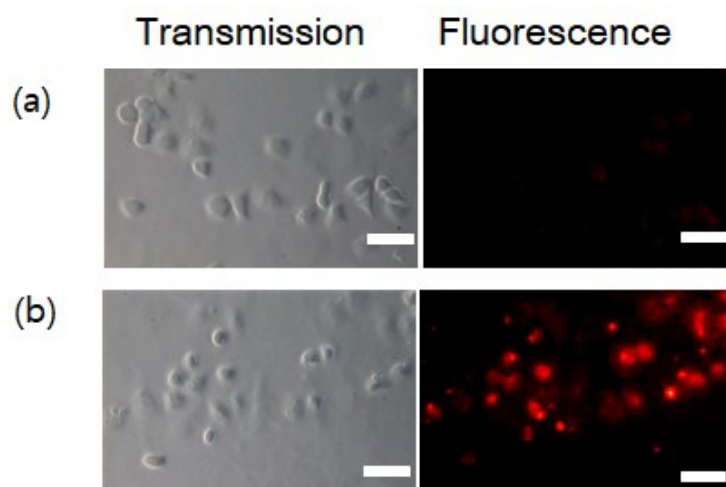

**Figure S9.** Transmission (left) and fluorescence (right) optical-microscope images of HER2-positive SK-BR-3 cells treated with 676-nm-emitting (a) DHLA/ZW-InP/ZnS:Cu/ZnS QDs and (b) DHLA/ZW-InP/ZnS:Cu/ZnS QDs conjugated with anti-HER2-antibody (Scale bar: 50  $\mu\text{m}$ ).

**Table S1.** Room-temperature tri-exponential photoluminescence decay fit parameters of the undoped and Cu doped quantum dot (QD) samples shown in Figure 1d, Figure 2d, and Figure 2e.

(1) Samples represented in Figure 1d

| Sample         | $A_1$ (%) | $\tau_1$ (ns) | $A_2$ (%) | $\tau_2$ (ns) | $A_3$ (%) | $\tau_3$ (ns) | $\tau_{ave}$ (ns) |
|----------------|-----------|---------------|-----------|---------------|-----------|---------------|-------------------|
| InP/ZnS QDs    | 15.9      | 1             | 69.8      | 31            | 14.3      | 78            | 47                |
| InP/ZnS:Cu QDs | 51.8      | 2             | 7.9       | 47            | 40.3      | 570           | 559               |

(2) Samples represented in Figure 2d

| Sample         | $A_1$ (%) | $\tau_1$ (ns) | $A_2$ (%) | $\tau_2$ (ns) | $A_3$ (%) | $\tau_3$ (ns) | $\tau_{ave}$ (ns) |
|----------------|-----------|---------------|-----------|---------------|-----------|---------------|-------------------|
| InP:Cu QDs     | 63.9      | 2             | 24.2      | 33            | 12.0      | 213           | 164               |
| InP:Cu/ZnS QDs | 26.4      | 1             | 34.3      | 73            | 39.2      | 364           | 320               |

(3) Samples represented in Figure 2e

| Sample             | $A_1$ (%) | $\tau_1$ (ns) | $A_2$ (%) | $\tau_2$ (ns) | $A_3$ (%) | $\tau_3$ (ns) | $\tau_{ave}$ (ns) |
|--------------------|-----------|---------------|-----------|---------------|-----------|---------------|-------------------|
| InP/ZnS:Cu QDs     | 30.7      | 1             | 32.4      | 43            | 36.9      | 322           | 292               |
| InP/ZnS:Cu/ZnS QDs | 22.1      | 1             | 21.4      | 78            | 56.5      | 357           | 335               |

PL decay time constants ( $\tau_i$ ), and corresponding amplitude percentages ( $A_i$ ).  $\tau_{ave}$  is intensity-weighted average lifetime.

[Reference]

R1. D. Battaglia and X. Peng, *Nano Lett.*, 2002, **2**, 1027-1030.
